# Supplementary material for: Elevated levels of perfluoroalkyl acids in family members of occupationally exposed workers: the importance of dust transfer
Source: PubMed Central journal article supplement (PMC5380130; doi:10.1038/srep09313), 2015-03-20
Supplement: srep09313-s1.pdf [file srep09313-s1.pdf]

Supplementary information

**Elevated levels of perfluoroalkyl acids in family members of occupationally exposed workers: the importance of dust transfer**

Jianjie Fu<sup>1</sup>, Yan Gao<sup>1</sup>, Thanh Wang<sup>1</sup>, Yong Liang<sup>2</sup>, Yawei Wang<sup>\*1</sup>, Aiqian Zhang<sup>\*1</sup>, and Guibin Jiang<sup>1</sup>

<sup>1</sup>State Key Laboratory of Environmental Chemistry and Ecotoxicology, Research Center for Eco-Environmental Sciences, Chinese Academy of Sciences, Beijing 100085, China

<sup>2</sup>Jiangnan University, Wuhan, Hubei, China

\*Corresponding author

Prof. Aiqian Zhang

Tel: 8610-62849157

Fax: 8610-62923549

E-mail: aqzhang@rcees.ac.cn

Dr. Yawei Wang

Tel: +8610-62849334

Fax: +8610-62849339

E-mail: ywwang@rcees.ac.cn

Research Center for Eco-Environmental Sciences,

Chinese Academy of Sciences

## Sampling Procedure

A total of 38 dust samples were collected; 8 dust samples were from different departments of the fluorochemical plant (Dust-P) and 30 dust samples from around the plant (Dust-A). Fifteen TSP samples were also collected, including 7 TSP samples from different departments of the plant (TSP-P) and 8 TSP samples in the surrounding environment around the fluorochemical plant (TSP-A). The spatial distribution of the sampling sites is shown in Figure S1.

Fifty-eight local residents who lived around this plant within a distance of less than 3 km were recruited in present study. Approximately 10 mL of blood sample was collected from each participant by a vacuum blood collection tube. The serum was separated from clotted blood by centrifugation at  $1100 \times g$  at  $4\text{ }^{\circ}\text{C}$  for 10 min and transferred to a 5mL corning polypropylene tube. The serum samples were placed on ice packs and immediately sent to the laboratory. The dust samples were collected by sweeping plastic brushes on the surface of the furniture. The TSP samples were collected by a mid-volume air sampler (Tianhong Intelligent Instrument Plant, Wuhan, China); the flow rate was set at 120 L per minute for 24 hours per sample. The TSP was collected on a Whatman quartz fibre filter (QFF), which was weighed before and after sampling to determine the TSP concentration. Both the dust and TSP samples were wrapped in aluminium foil and sealed in small polyethylene zip bags. All of the samples were stored at  $-20\text{ }^{\circ}\text{C}$  until analysis.

According to our questionnaires, the food source of our studied populations was mainly directly purchased from the local market, and the drinking water was supplied by the municipal water systems. During our sampling time, we collected 6 drinking water samples directly from the tap and 9 duplicate diet samples from local residents. The diet samples were directly collected from their table when they were eating their meals. The diet samples were stored in a cooler with ice packs during the sampling day and transported to the laboratory where they were then homogenised and lyophilised. Furthermore, drinking water samples were directly collected from tap

waters from municipal water systems. Clothes were randomly collected from five workers when they went home from work and nine clothes of nearby residents were also collected.

## Sample Pretreatment

### **Serum, dust, TSP samples**

The serum samples were first spiked with 5 ng mass-labelled PFOS and PFOA and then extracted by ion-pairing extraction using MTBE three times. The combined extraction was further concentrated under gentle nitrogen gas and the solvent exchanged with 0.5 mL methanol. The mixture was then diluted with 50 mL water and loaded onto an Oasis-HLB cartridge (Waters, 6 cc, 150 mg). The cartridge was washed using 5 mL of methanol/water (1:4) after the sample was loaded. The target analytes were then eluted using 10 mL of methanol. The final elution was concentrated to 1 mL for HPLC-MSMS analysis. For TSP samples, the filters were cut into small pieces (less than 2×2 mm) by a pair of stainless steel-scissors before extraction. The dust and TSP samples were first spiked with 5 ng mass-labelled internal standards. After equilibrating for approximately four hours, 5 mL of methanol was added to extract PFAAs, samples were extracted under ultrasound for 20 minutes, the ultrasonic extraction was performed for three times. The extracts were combined and concentrated to 0.5 ml under gentle nitrogen gas. The solid phase extraction procedure was then performed in the same way as the serum samples.

### **Drinking water samples and the wash-off water of clothes**

Solid phase extraction was used for water samples. The WAX column (Waters, 6 cc, 150 mg) was pre-activated using 4 mL of 0.1 % ammonium hydroxide in methanol, 4 mL of methanol and 4 mL of water. Before loading, 5 ng of internal standards <sup>13</sup>C-labelled PFHxS, PFOS, and PFOA were added into the 500 ml water sample and equilibrated for two hours. After 500 ml water sample was loaded on the column, four

millilitres of ammonium acetate (pH=4) was loaded. Then, the column was dried by centrifugation at 3000 rpm for 15 min. The WAX column were cleaned by 4 mL of methanol to remove the impurity after drying, the target compounds were eluted by 4 mL of 0.1 % ammonium hydroxide in methanol. Finally, the elution was concentrated to approximately 1 ml using a gentle stream of N<sub>2</sub>.

The clothes were first weighed and placed into a polypropylene box. Two litres of distilled water was added to the box and shaken for approximately 20 min. The wash-off water was collected to analyse the PFAAs. We took 100 ml of the wash-off water to analyse the PFAAs and the pretreatment procedure for the wash-off water was the same as that for the drinking water except for the sampling volume.

### **Duplicate diet samples**

Approximately 0.2g of the diet dried samples was weighed into the PP bottles. Ten millilitres of 50 mM KOH in methanol was added and shaken for 16 hours. The extract was concentrated to 1 mL. The concentrated extract was added with 40 mL of Milli-Q water and 0.5 mL of 1 M HCl. The WAX cartridges were preconditioned with 4 mL of 0.1 % ammonium hydroxide in methanol, 4 mL of methanol and 4 mL of water. The diluted extract was loaded onto the cartridge. Four millilitres of ammonium acetate (pH=4) was then added. Then, the column was dried by centrifugation at 3000 rpm for 15 min. The cartridges were cleaned with 4 mL of methanol and then eluted with 4 mL of 0.1% ammonium hydroxide in methanol. The elution was concentrated to 1 mL for injection.

## Supplementary Results

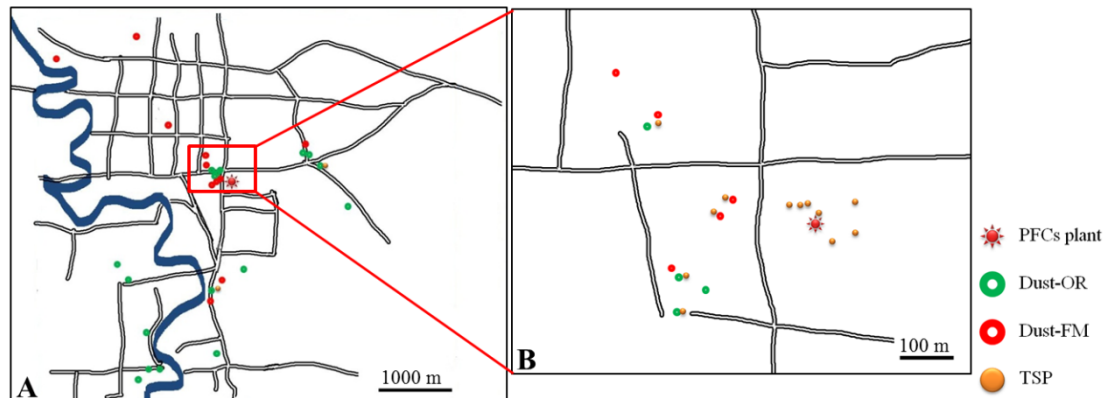

Figure S1 The spatial distribution of dust and TSP sampling sites.

(Dust-OR: dust samples from ordinary residents; Dust-FM: dust samples from a family member of occupational workers)

Table S1. Descriptive statistics of the demographic information in this study

|              |                          | Min  | Max  | Median | Average | SD   |
|--------------|--------------------------|------|------|--------|---------|------|
| Total<br>58  | Height (cm)              | 150  | 180  | 164    | 163     | 7    |
|              | Weight (kg)              | 42   | 80   | 57     | 60      | 10   |
|              | BMI (kg/m <sup>2</sup> ) | 17.2 | 28.0 | 22.3   | 22.2    | 2.8  |
|              | Age                      | 21   | 71   | 48     | 48      | 13   |
| Female<br>41 | Height (cm)              | 150  | 170  | 160    | 160.5   | 5.0  |
|              | Weight (kg)              | 42   | 75   | 55     | 55.9    | 8.6  |
|              | BMI (kg/m <sup>2</sup> ) | 17.2 | 28.0 | 21.8   | 21.7    | 2.8  |
|              | Age                      | 21   | 71   | 47     | 47.5    | 12.9 |
| Male<br>17   | Height (cm)              | 154  | 180  | 170    | 170     | 6    |
|              | Weight (kg)              | 52   | 80   | 65     | 68      | 9    |
|              | BMI (kg/m <sup>2</sup> ) | 18.9 | 26.7 | 23.9   | 23.5    | 2.4  |
|              | Age                      | 22   | 65   | 49     | 50      | 12   |

Table S2. Spiked recoveries of PFAAs in different matrices (n=3)

| Spiked-concentration<br>(ng/g) |          | PFBS   | PFHxS  | PFOS   | PFHpA  | PFOA   |
|--------------------------------|----------|--------|--------|--------|--------|--------|
| GFF filter                     |          |        |        |        |        |        |
| 5                              | Recovery | 99.2%  | 95.5%  | 93.0%  | 99.9%  | 112.6% |
|                                | RSD      | 2.3%   | 2.4%   | 2.0%   | 3.0%   | 2.8%   |
| 10                             | Recovery | 105.5% | 107.0% | 110.5% | 93.8%  | 105.5% |
|                                | RSD      | 3.5%   | 5.7%   | 6.4%   | 11.5%  | 6.4%   |
| Dust                           |          |        |        |        |        |        |
| 10                             | Recovery | 85.1%  | 75.9%  | 88.3%  | 76.1%  | 81.9%  |
|                                | RSD      | 7.3%   | 2.1%   | 6.9%   | 7.8%   | 9.0%   |
| 50                             | Recovery | 90.9%  | 87.5%  | 86.8%  | 87.0%  | 80.6%  |
|                                | RSD      | 1.8%   | 1.7%   | 1.7%   | 1.7%   | 1.6%   |
| Serum                          |          |        |        |        |        |        |
| 25                             | Recovery | 95.5%  | 110.3% | 101.5% | 82.6%  | 96.6%  |
|                                | RSD      | 3.5%   | 4.2%   | 3.8%   | 1.6%   | 3.1%   |
| 50                             | Recovery | 102.8% | 105.7% | 98.1%  | 84.2%  | 94.9%  |
|                                | RSD      | 14.6%  | 1.4%   | 2.4%   | 1.7%   | 4.4%   |
| Duplicate diet                 |          |        |        |        |        |        |
| 0.5                            | Recovery | 91.5%  | 98.9%  | 99.0%  | 102.7% | 96.3%  |
|                                | RSD      | 10.4%  | 8.4%   | 3.2%   | 17.9%  | 4.9%   |
| 5                              | Recovery | 85.3%  | 82.2%  | 90.2%  | 63.2%  | 98.1%  |
|                                | RSD      | 6.3%   | 4.6%   | 5.9%   | 7.3%   | 4.0%   |
| Water                          |          |        |        |        |        |        |
| 10                             | Recovery | 78.7%  | 106.4% | 85.6%  | 81.5%  | 89.9%  |
|                                | RSD      | 5.9%   | 4.9%   | 4.3%   | 3.3%   | 9.3%   |
| 100                            | Recovery | 104.9% | 111.3% | 110.0% | 102.6% | 107.7% |
|                                | RSD      | 3.1%   | 7.9%   | 10.2%  | 5.9%   | 0.6%   |

Table S3.Descriptive statistics for serum PFAAs in local residents (n=58, ng/mL)

|             | Min  | Max  | Median | AM    | GM <sup>a</sup> |
|-------------|------|------|--------|-------|-----------------|
| PFBS        | 0.6  | 230  | 6.4    | 22.4  | 7.85            |
| PFHxS       | 4.33 | 3164 | 27.6   | 133.9 | 33.7            |
| PFOS        | 26.1 | 4503 | 196.6  | 438.1 | 210             |
| PFHpA       | n.d. | 15.7 | 1.1    | 2.0   | 1.9             |
| PFOA        | 1.28 | 765  | 10.7   | 49.6  | 15.2            |
| Total PFAAs | 37.4 | 7830 | 257.8  | 645.8 | 299             |

a:In cases where an individual PFAA was not detected, the levels were set as LOD/2

during the calculation of the geometric mean.



Table S4. Detailed descriptive statistics for serum PFAAs (ng/ml) in local residents divided by males and females

|             | Min         | Max   | Median | AM   | GM   | Min           | Max  | Median | AM   | GM   |
|-------------|-------------|-------|--------|------|------|---------------|------|--------|------|------|
|             | Male (n=21) |       |        |      |      | Female (n=37) |      |        |      |      |
| PFBS        | 0.84        | 129   | 9.6    | 26.7 | 9.5  | 0.6           | 230  | 6.05   | 20.6 | 7.04 |
| PFHxS       | 4.33        | 3164  | 75.02  | 355  | 51.5 | 5             | 236  | 25.5   | 42.3 | 26.5 |
| PFOS        | 53.5        | 4503  | 245.75 | 920  | 326  | 26.1          | 956  | 176    | 238  | 164  |
| PFHpA       | 0.77        | 15.74 | 1.065  | 2.13 | 2.73 | n.d.          | 7.7  | 1.14   | 1.92 | 1.59 |
| PFOA        | 1.94        | 765   | 11.52  | 108  | 20.8 | 1.28          | 142  | 10.6   | 25.4 | 12.8 |
| Total PFAAs | 92.8        | 7830  | 625.44 | 1411 | 464  | 37.4          | 1243 | 242    | 328  | 233  |

Table S5. Detailed descriptive statistics for serum PFAAs (ng/ml) in local residents divided by age

|             | Min              | Max  | Median | AM   | GM   | Min           | Max  | Median | AM   | GM   |
|-------------|------------------|------|--------|------|------|---------------|------|--------|------|------|
|             | $\leq 45$ (n=23) |      |        |      |      | $> 45$ (n=35) |      |        |      |      |
| PFBS        | 0.72             | 121  | 4.00   | 17.2 | 7.22 | 0.6           | 230  | 10.5   | 26.3 | 8.29 |
| PFHxS       | 5                | 3164 | 25.5   | 73.1 | 39.6 | 4.33          | 498  | 29.1   | 180  | 30.3 |
| PFOS        | 36               | 4503 | 199    | 362  | 185  | 26.1          | 3014 | 189    | 496  | 229  |
| PFHpA       | n.d.             | 7.7  | 1.30   | 2.21 | 1.39 | 0.76          | 15.7 | 1.10   | 1.80 | 2.27 |
| PFOA        | 1.28             | 765  | 10.7   | 50.2 | 13.7 | 1.94          | 505  | 10.6   | 49.1 | 16.4 |
| Total PFAAs | 57.2             | 7830 | 247    | 505  | 276  | 37.4          | 3649 | 268    | 753  | 314  |

Table S6. PFAAs in drinking water (ng/L)

|     | PFBS | PFHxS | PFOS | PFOA | PFHpA |
|-----|------|-------|------|------|-------|
| OR1 | 1.62 | 2.56  | n.d. | 2.08 | n.d.  |
| OR2 | 1.64 | n.d.  | n.d. | 2.02 | n.d.  |
| OR3 | 9.52 | n.d.  | n.d. | n.d. | n.d.  |
| FM1 | 6.54 | n.d.  | n.d. | n.d. | n.d.  |
| FM2 | 6.56 | n.d.  | n.d. | n.d. | n.d.  |
| FM3 | 37.4 | 3.50  | 3.04 | n.d. | 2.98  |

Table S7. PFAAs in the duplicate diet samples (ng/g ww)

|                                   | PFHpA | PFOA  | PFBS   | PFHxS | PFOS  |
|-----------------------------------|-------|-------|--------|-------|-------|
| Duplicate diet of local residents |       |       |        |       |       |
| 1                                 | n.d.  | n.d.  | n.d.   | 0.119 | n.d.  |
| 2                                 | n.d.  | n.d.  | n.d.   | 0.101 | n.d.  |
| 3                                 | n.d.  | n.d.  | n.d.   | 0.123 | n.d.  |
| 4                                 | 0.18  | n.d.  | 5.247  | 0.067 | 0.158 |
| 5                                 | 0.513 | n.d.  | 21.167 | 0.323 | 2.84  |
| 6                                 | 0.499 | 0.103 | 26.967 | 0.448 | 3.47  |
| 7                                 | n.d.  | n.d.  | 3.837  | 0.118 | 0.247 |
| 8                                 | n.d.  | n.d.  | 1.447  | 0.276 | 0.21  |
| 9                                 | n.d.  | n.d.  | 4.297  | 0.138 | 0.294 |
| GM                                | 0.10  | 0.05  | 1.28   | 0.16  | 0.24  |
| AM                                | 0.17  | 0.06  | 7.01   | 0.19  | 0.82  |
| SD                                | 0.20  | 0.02  | 9.97   | 0.13  | 1.34  |
| OR                                |       |       |        |       |       |
| 1                                 | n.d.  | n.d.  | n.d.   | 0.119 | n.d.  |
| 2                                 | n.d.  | n.d.  | n.d.   | 0.101 | n.d.  |
| 3                                 | n.d.  | n.d.  | n.d.   | 0.123 | n.d.  |
| 4                                 | 0.18  | n.d.  | 5.247  | 0.067 | 0.158 |
| GM                                | 0.069 | 0.050 | 0.160  | 0.100 | 0.067 |
| AM                                | 0.083 | 0.050 | 1.349  | 0.103 | 0.077 |
| SD                                | 0.065 | 0.000 | 2.599  | 0.026 | 0.054 |
| FM                                |       |       |        |       |       |
| 5                                 | 0.513 | n.d.  | 21.167 | 0.323 | 2.84  |
| 6                                 | 0.499 | 0.103 | 26.967 | 0.448 | 3.47  |
| 7                                 | n.d.  | n.d.  | 3.837  | 0.118 | 0.247 |
| 8                                 | n.d.  | n.d.  | 1.447  | 0.276 | 0.21  |
| 9                                 | n.d.  | n.d.  | 4.297  | 0.138 | 0.294 |
| GM                                | 0.13  | 0.06  | 6.71   | 0.23  | 0.68  |
| AM                                | 0.23  | 0.06  | 11.54  | 0.26  | 1.41  |
| SD                                | 0.25  | 0.02  | 11.67  | 0.14  | 1.61  |

Table S8. Detailed information of PFCs levels in dust and TSP samples (Dust: ng/g; TSP: ng/m<sup>3</sup>)

|       | Min     | Max     | GM     | Min    | Max   | GM    | Min     | Max   | GM    |
|-------|---------|---------|--------|--------|-------|-------|---------|-------|-------|
|       | Dust-P  |         |        | Dust-A |       |       | Dust-FM |       |       |
| PFBS  | 57293   | 5338491 | 329766 | 4.69   | 13854 | 433   | 1165    | 13854 | 3234  |
| PFHxS | 1481    | 257201  | 22666  | 0.435  | 708   | 14.5  | 15.4    | 708   | 91.4  |
| PFOS  | 36212   | 3156673 | 337715 | 2.68   | 18487 | 173   | 271     | 18487 | 1599  |
| PFHpA | 3415    | 92674   | 12583  | 1.84   | 825   | 101   | 104     | 825   | 323   |
| PFOA  | 10901   | 253081  | 49870  | 5.00   | 1230  | 136   | 63.4    | 1230  | 566   |
|       | Dust-OR |         |        | TSP-P  |       |       | TSP-A   |       |       |
| PFBS  | 4.69    | 3174    | 183.1  | 0.533  | 1708  | 8.15  | 0.024   | 0.486 | 0.154 |
| PFHxS | n.d     | 91.0    | 3.84   | 0.439  | 13.7  | 1.44  | 0.014   | 0.215 | 0.040 |
| PFOS  | 2.68    | 688     | 66.6   | 0.498  | 93.6  | 3.54  | 0.021   | 0.608 | 0.132 |
| PFHpA | 1.84    | 632     | 64.9   | 1.74   | 564   | 17.1  | 0.006   | 2.30  | 0.111 |
| PFOA  | n.d     | 793     | 50.7   | 2.81   | 5761  | 75.6  | 0.022   | 1.09  | 0.161 |
|       | TSP-FM  |         |        | TSP-OR |       |       |         |       |       |
| PFBS  | 0.024   | 0.486   | 0.167  | 0.030  | 0.470 | 0.142 |         |       |       |
| PFHxS | 0.014   | 0.120   | 0.039  | 0.014  | 0.215 | 0.041 |         |       |       |
| PFOS  | 0.021   | 0.550   | 0.128  | 0.026  | 0.608 | 0.136 |         |       |       |
| PFHpA | 0.008   | 0.612   | 0.060  | 0.006  | 2.30  | 0.205 |         |       |       |
| PFOA  | 0.022   | 0.379   | 0.105  | 0.027  | 1.091 | 0.248 |         |       |       |

Table S9. Detailed statistics data of serum PFAAs levels in four individual quartiles (ng/mL)

|             | Q1   |      |      | Q2    |      |      | Q3    |      |      | Q4    |      |       |
|-------------|------|------|------|-------|------|------|-------|------|------|-------|------|-------|
|             | Min  | Max  | GM   | Min   | Max  | GM   | Min   | Max  | GM   | Min   | Max  | GM    |
| PFBS        | 3.65 | 230  | 27.2 | 1.38  | 114  | 8.62 | 0.840 | 32.8 | 6.55 | 0.600 | 18.4 | 2.46  |
| PFHxS       | 29.1 | 3164 | 178  | 11.0  | 236  | 42.3 | 6.00  | 52.6 | 22.4 | 4.33  | 31.7 | 7.57  |
| PFOS        | 201  | 4503 | 889  | 174   | 432  | 266  | 72.3  | 220  | 137  | 26.1  | 92.3 | 59    |
| PFHpA       | 1.36 | 11.1 | 3.53 | 0.793 | 15.7 | 2.23 | 0.853 | 2.66 | 1.34 | n.d.  | 1.74 | 0.860 |
| PFOA        | 8.36 | 765  | 54.9 | 5.84  | 80.5 | 16.5 | 1.94  | 102  | 10.8 | 1.28  | 34.5 | 5.42  |
| Total PFAAs | 625  | 7830 | 1352 | 268   | 579  | 367  | 110   | 248  | 195  | 37.4  | 108  | 81.0  |

Table S10. Detailed descriptive statistics for serum PFAAs in family members and ordinary residents (ng/ml)

| Compounds | Family Members (N=32) |      |        |      |      | Ordinary Residents (N=26) |      |        |      |      |
|-----------|-----------------------|------|--------|------|------|---------------------------|------|--------|------|------|
|           | min                   | max  | median | AM   | GM   | min                       | max  | median | AM   | GM   |
| PFBS      | 1.38                  | 230  | 12.9   | 34.3 | 12.7 | 0.60                      | 32.8 | 4.18   | 7.64 | 4.35 |
| PFHxS     | 11.0                  | 3164 | 58.9   | 225  | 74.3 | 4.33                      | 155  | 9.45   | 21.8 | 12.7 |
| PFOS      | 103                   | 4503 | 319    | 686  | 390  | 26.1                      | 591  | 82.8   | 133  | 98.1 |
| PFHpA     | 0.79                  | 11.1 | 1.84   | 3.10 | 2.26 | n.d.                      | 15.7 | 1.50   | 2.34 | 1.48 |
| PFOA      | 4.3                   | 765  | 19.2   | 75.8 | 24.2 | 1.28                      | 102  | 7.81   | 17.2 | 8.62 |
| T-PFAAs   | 144                   | 7830 | 443    | 1023 | 564  | 37.4                      | 774  | 105    | 181  | 136  |

Table S11.Attached PFAAs levels on clothes of workers and nearby residents (ng/g)

| No.                  | PFOS   | PFBS   | PFHxS | PFHpA | PFOA | Total  |
|----------------------|--------|--------|-------|-------|------|--------|
| Ordinary residents   |        |        |       |       |      |        |
| 1                    | 2035   | 10531  | 431   | 190   | 113  | 13300  |
| 2                    | 582    | 6578   | 197   | 52.7  | 32.1 | 7441   |
| 3                    | 598    | 3115   | 38.1  | 40.2  | 25.6 | 3816   |
| 4                    | 1557   | 4148   | 28.0  | 22.6  | 23.4 | 5779   |
| 5                    | 30.0   | 153    | 14.2  | 76.6  | 18.3 | 292    |
| 6                    | 97.0   | 6718   | 50.9  | 357   | 157  | 7381   |
| 7                    | 1266   | 15667  | 420   | 2249  | 2034 | 21637  |
| 8                    | 46.5   | 1531   | 18.2  | 127   | 41.4 | 1763   |
| 9                    | 42.2   | 3281   | 25.4  | 71.2  | 43.6 | 3463   |
| GM                   | 271    | 3466   | 61.5  | 120   | 65.7 | 4402   |
| Occupational workers |        |        |       |       |      |        |
| 10                   | 28185  | 95810  | 6771  | 1374  | 1611 | 133750 |
| 11                   | 15882  | 54534  | 1425  | 396   | 657  | 72893  |
| 12                   | 36918  | 175483 | 3024  | 2208  | 3000 | 220633 |
| 13                   | 271021 | 662595 | 14954 | 4425  | 5070 | 958065 |
| 14                   | 91581  | 136986 | 3849  | 3133  | 4872 | 240422 |
| GM                   | 52795  | 152773 | 4416  | 1755  | 2392 | 218275 |
